# Supplementary material for: Platinum(II) mediated Csp3-H activation of tetramethylthiourea
Source: Royal Society of Chemistry journal article supplement (doi:10.1039/b911164f), 2009-01-01
Supplement: b911164f.pdf [file b911164f.pdf]

Paper: Platinum(II) mediated C<sup>sp3</sup>-H activation of tetramethylthiourea  
*Serena Fantasia*,<sup>a,b</sup> *Alessandro Pasini*<sup>a\*</sup> and *Steven P. Nolan*<sup>b,c\*</sup>

<sup>a</sup>Dipartimento di Chimica Inorganica, Metallorganica e Analitica (CIMA), Università degli Studi di Milano, Via Venezian 21, 20133 Milan, Italy. <sup>b</sup>Institute of Chemical Research of Catalonia (ICIQ), Av. Països Catalans 16, 43007 Tarragona, Spain. <sup>c</sup>School of Chemistry, University of St Andrews, St Andrews, KY16 9ST, UK.

### Electronic supplementary information

|                                                                                 |    |
|---------------------------------------------------------------------------------|----|
| Experimental: general.....                                                      | S2 |
| Synthesis of [L <sub>2</sub> Pt(NO <sub>3</sub> ) <sub>2</sub> ] complexes..... | S2 |
| Synthesis of [L <sub>2</sub> Pt(tmtu*)]NO <sub>3</sub> complexes.....           | S4 |
| References and notes.....                                                       | S5 |

## Experimental

**General considerations:** All manipulations unless otherwise noted were carried out in air. Solvents and reagents were used as received. *Cis*-[Pt(PPh<sub>3</sub>)<sub>2</sub>Cl<sub>2</sub>], <sup>1</sup> *cis*-[Pt(P(4-tol)<sub>3</sub>)<sub>2</sub>Cl<sub>2</sub>], <sup>2</sup> *cis*-[Pt(P(4-F-Ph)<sub>3</sub>)<sub>2</sub>Cl<sub>2</sub>], <sup>3</sup> [Pt(dppp)Cl<sub>2</sub>], <sup>4</sup> *cis*-[Pt(dmsO)<sub>2</sub>Cl<sub>2</sub>], <sup>5</sup> *cis*-[Pt(PPh<sub>3</sub>)<sub>2</sub>(NO<sub>3</sub>)<sub>2</sub>] **7a**, <sup>6</sup> [Pt(PPh<sub>3</sub>)<sub>2</sub>(tmtu\*)](NO<sub>3</sub>) **2**<sup>7</sup> and the carbene ligand ICy **6**<sup>8</sup> were synthesized according to literature procedures. Elemental analyses were performed at the Microanalytical Laboratory, the University of Milano. Mass spectra were recorded on a Water LCT Premier instrument. NMR spectra were recorded in CDCl<sub>3</sub> solution on a Bruker Avance DRX 300 MHz and 400 MHz. <sup>195</sup>Pt spectra were calibrated with Na<sub>2</sub>[PtCl<sub>6</sub>] in D<sub>2</sub>O as 4522 ppm.

### Synthesis of [PtL<sub>2</sub>(NO<sub>3</sub>)<sub>2</sub>] Complexes

*cis*-[Pt(P(4-tol)<sub>3</sub>)<sub>2</sub>(NO<sub>3</sub>)<sub>2</sub>] **7b**. 132.0 mg of *cis*-[Pt(P(4-tol)<sub>3</sub>)<sub>2</sub>Cl<sub>2</sub>] (0.150 mmol) are dissolved in 15 mL of CHCl<sub>3</sub> and 102.5 mg of AgNO<sub>3</sub> (0.6 mmol) are added. The suspension is refluxed for 8 h in the dark. The hot solution is filtered on a frit and the residue washed with hot CHCl<sub>3</sub> (3x20 mL). The solvent is collected in a flask and the volume reduced in vacuum to 4 mL. Addition of 15 mL of diisopropyl ether affords, after filtration, 132.0 mg of a white product (94% yield). <sup>1</sup>H NMR:  $\delta$  (ppm) 7.37 (t, *J* = 8.3 Hz, 12 H, *CH* arom), 7.02 (d, *J* = 6.9 Hz, 12 H, *CH* arom), 2.36 (s, 18 H, *CH*<sub>3</sub>). <sup>31</sup>P NMR:  $\delta$  (ppm) 2.2 (s, <sup>1</sup>*J*<sub>Pt-P</sub> = 4028 Hz). Anal. Calcd for C<sub>42</sub>H<sub>42</sub>N<sub>2</sub>O<sub>6</sub>P<sub>2</sub>Pt (927.82): C, 54.37; H, 4.56; N, 3.02. Found: C, 54.54; H 4.23; N, 2.95.

***cis*-[Pt(P(4-F-Ph)<sub>3</sub>)<sub>2</sub>(NO<sub>3</sub>)<sub>2</sub>] 7c.** 141.9 mg of *cis*-[Pt(P(4-F-Ph)<sub>3</sub>)<sub>2</sub>Cl<sub>2</sub>] (0.158 mmol) are dissolved in 50 mL of CHCl<sub>3</sub> and 120.7 mg of AgNO<sub>3</sub> (0.71 mmol) are added. The suspension is refluxed for 8 h in the dark. The hot solution is filtered on a frit and the residue washed with hot CHCl<sub>3</sub> (3x20 mL). The solvent is collected in a flask and the volume reduced to 4 mL in vacuum. Addition of 15 mL of diisopropyl ether affords, after filtration, 105.4 mg of a white product (67% yield). <sup>1</sup>H NMR:  $\delta$  (ppm) 7.46 (m, broad, 12 H, CH arom), 6.93 (m, broad, 12 H, CH arom). <sup>31</sup>P NMR:  $\delta$  (ppm) 1.8 (s, <sup>1</sup>J<sub>Pt-P</sub> = 4021 Hz). Anal. Calcd for C<sub>36</sub>H<sub>24</sub>F<sub>6</sub>N<sub>2</sub>O<sub>6</sub>P<sub>2</sub>Pt (951.60): C, 45.44; H, 2.54; N, 2.94. Found: C, 45.63; H 2.36; N, 3.13.

**[Pt(dppp)(NO<sub>3</sub>)<sub>2</sub>] 7d.** 139.6 mg of [Pt(dppp)Cl<sub>2</sub>] (0.206 mmol) are dissolved in 20 mL of CHCl<sub>3</sub> and 110.0 mg of AgNO<sub>3</sub> (0.62 mmol) are added. The suspension is refluxed for 10 h in the dark. The hot solution is filtered on a frit and the residue washed with hot CHCl<sub>3</sub> (3x20 mL). The solvent is collected in a flask and the volume reduced in vacuum to 4 mL. Addition of 15 mL of diisopropyl ether affords, after filtration, 102.5 mg of a white product (68% yield). <sup>1</sup>H NMR:  $\delta$  (ppm) 7.77 (m, broad, 8 H, CH arom), 7.44 (m, broad, 12 H, CH arom), 2.52 (m, broad, 4 H, CH<sub>2</sub>P), 2.05 (m, broad, 2H, CH<sub>2</sub>). <sup>31</sup>P NMR:  $\delta$  (ppm) -13.4 (s, <sup>1</sup>J<sub>Pt-P</sub> = 3664 Hz). Anal. Calcd for C<sub>27</sub>H<sub>26</sub>N<sub>2</sub>O<sub>6</sub>P<sub>2</sub>Pt (731.09): C, 44.33; H, 3.58; N, 3.83. Found: C, 44.42; H 3.75; N, 3.42.

***cis*-[Pt(ICy)<sub>2</sub>(NO<sub>3</sub>)<sub>2</sub>] 9.** 129.6 mg of *cis*-[Pt(ICy)<sub>2</sub>Cl<sub>2</sub>] (0.178 mmol) are dissolved in 30 mL of CH<sub>2</sub>Cl<sub>2</sub> and 121.2 mg of AgNO<sub>3</sub> (0.713 mmol) are added. The suspension is refluxed overnight in the dark. The hot solution is filtered on a frit and the residue washed with hot

CH<sub>2</sub>Cl<sub>2</sub> (3x20 mL). The solvent is collected in a flask and the volume reduced to 4 mL in vacuum. Addition of 15 mL of diethyl ether affords, after filtration, 120.4 mg of a white product (86% yield). <sup>1</sup>H NMR (CDCl<sub>3</sub>, 400 MHz): δ 6.99 (s, 4H, CH imidazole), 4.89 (m, 4 H, CH cyclohexyl), 2.25 (d broad, *J* = 12 Hz, 4 H, CH<sub>2</sub> cyclohexyl), 1.84 (t broad, *J* = 14 Hz, 8 H, CH<sub>2</sub> cyclohexyl), 1.75 (t broad, *J* = 12 Hz, 8 H, CH<sub>2</sub> cyclohexyl), 1.53 (m, 8 H, CH<sub>2</sub> cyclohexyl), 1.40 (m, 8 H, CH<sub>2</sub> cyclohexyl), 1.21(m, 4 H, CH<sub>2</sub> cyclohexyl). <sup>13</sup>C NMR (CDCl<sub>3</sub>, 400 MHz): δ 133.7 (s, C carbene), 118.1 (s, CH imidazole), 59.4 (s, CH cyclohexyl), 34.9 (s, CH<sub>2</sub> cyclohexyl), 33.5 (s, CH<sub>2</sub> cyclohexyl), 25.2 (s, CH<sub>2</sub> cyclohexyl), 25.1 (s, CH<sub>2</sub> cyclohexyl), 25.0 (s, CH<sub>2</sub> cyclohexyl). ESI-MS (HRMS): calcd. For C<sub>30</sub>H<sub>48</sub>N<sub>5</sub>O<sub>3</sub>Pt [M-(NO<sub>3</sub>)]<sup>+</sup>: 721.3405. Found: 721.3422.

### Synthesis of [PtL<sub>2</sub>(tmtu\*)]NO<sub>3</sub> complexes

**[Pt(P(4-tol)<sub>3</sub>)<sub>2</sub>(tmtu\*)](NO<sub>3</sub>) 7\*b.** 93.1 mg of *cis*-[Pt(P(4-tol)<sub>3</sub>)<sub>2</sub>(NO<sub>3</sub>)<sub>2</sub>] (0.1 mmol) are dissolved in 20 mL of CHCl<sub>3</sub> and 13.3 mg of tmtu (0.1 mmol) are added. The solution is stirred at room temperature for 5 h. The solvent volume is reduced to 4 mL in vacuum. Addition of 15 mL of *n*-hexane affords, after filtration, 73.0 mg of a white product (73% yield). <sup>1</sup>H NMR: δ(ppm) 7.10-7.30 (m, broad, 12 H, CH arom), 6.90-7.05 (m, broad, 12 H, CH arom), 3.44 (t, <sup>3</sup>*J*<sub>P-H</sub> = 5 Hz, <sup>2</sup>*J*<sub>Pt-H</sub> = 59 Hz, 2 H, CH<sub>2</sub>Pt), 3.02 (s, 3 H CH<sub>3</sub>N), 2.97 (s, 6 H, (CH<sub>3</sub>)<sub>2</sub>N), 2.18 (s, 18 H, CH<sub>3</sub>). <sup>31</sup>P NMR: δ(ppm) 20.2 (d, <sup>2</sup>*J*<sub>P-P</sub> = 23 Hz, <sup>1</sup>*J*<sub>Pt-P</sub> = 3406 Hz, P *trans* S), 15.6 (d, <sup>2</sup>*J*<sub>P-P</sub> = 23 Hz, <sup>1</sup>*J*<sub>Pt-P</sub> = 2037 Hz, P *trans* C). Anal. Calcd for C<sub>47</sub>H<sub>53</sub>N<sub>3</sub>O<sub>3</sub>P<sub>2</sub>PtS (997.03): C, 56.62; H, 5.36; N, 4.21. Found: C, 57.01; H 5.57; N, 3.98.

**[Pt(P(4-F-Ph)<sub>3</sub>)(tmtu\*)](NO<sub>3</sub>) 7\*c.** 50.0 mg of *cis*-[Pt(P(4-F-Ph)<sub>3</sub>)(NO<sub>3</sub>)<sub>2</sub>] (0.053 mmol) are dissolved in 20 mL of CHCl<sub>3</sub> and 7.0 mg of tmtu (0.053 mmol) are added. The solution is stirred at room temperature for 5 h. The solvent is reduced to 4 mL in vacuum. Addition of 15 mL of diisopropyl ether affords, after filtration, 33.0 mg of a white product (61% yield). <sup>1</sup>H NMR: δ (ppm) 7.20-7.50 (m, broad, 12 H, CH arom), 6.90-7.10 (m, broad, 12 H, CH arom), 3.48 (t, <sup>3</sup>J<sub>P-H</sub> = 5 Hz, <sup>2</sup>J<sub>Pt-H</sub> = 73 Hz, 2 H, CH<sub>2</sub>Pt), 3.06 (s, 3 H CH<sub>3</sub>N), 2.99 (s, 6 H, (CH<sub>3</sub>)<sub>2</sub>N). <sup>31</sup>P NMR: δ (ppm) 20.7 (d, <sup>2</sup>J<sub>P-P</sub> = 23 Hz, <sup>1</sup>J<sub>Pt-P</sub> = 3483 Hz, P *trans* S), 15.6 (d, <sup>2</sup>J<sub>P-P</sub> = 23 Hz, <sup>1</sup>J<sub>Pt-P</sub> = 2010 Hz, P *trans* C). Anal. Calcd for C<sub>41</sub>H<sub>35</sub>F<sub>6</sub>N<sub>3</sub>O<sub>3</sub>P<sub>2</sub>PtS (1020.82): C, 48.24; H, 3.46; N, 4.12. Found: C, 47.95; H 3.21; N, 4.21.

**[Pt(dppp)(tmtu\*)](NO<sub>3</sub>) 7\*d.** 51.1 mg of [Pt(dppp)(NO<sub>3</sub>)<sub>2</sub>] (0.07 mmol) are dissolved in 25 mL of CH<sub>2</sub>Cl<sub>2</sub> and 9.2 mg of tmtu (0.07 mmol) are added. The solution is stirred at room temperature for 2 days. The solvent is reduced in vacuum to 4 mL. Addition of 15 mL of *n*-hexane affords, after filtration, 40.0 mg of a white product (71% yield). <sup>1</sup>H NMR: δ (ppm) 7.20-7.50 (m, broad, 20 H, CH arom), 3.38 (t, <sup>3</sup>J<sub>P-H</sub> = 6 Hz, <sup>2</sup>J<sub>Pt-H</sub> = 56 Hz, 2 H, CH<sub>2</sub>Pt), 3.06 (s, 3 H CH<sub>3</sub>N), 2.96 (s, 6 H, (CH<sub>3</sub>)<sub>2</sub>N), 2.30 (m, broad, 4 H, CH<sub>2</sub>P), 1.93 (m, broad, 2H, CH<sub>2</sub>). <sup>31</sup>P NMR: δ (ppm) 0.7 (d, <sup>2</sup>J<sub>P-P</sub> = 34 Hz, <sup>1</sup>J<sub>Pt-P</sub> = 3189 Hz, P *trans* S), -5.4 (d, <sup>2</sup>J<sub>P-P</sub> = 34 Hz, <sup>1</sup>J<sub>Pt-P</sub> = 1877 Hz, P *trans* C). Anal. Calcd for C<sub>32</sub>H<sub>37</sub>N<sub>3</sub>O<sub>3</sub>P<sub>2</sub>PtS (800.75): C, 48.00; H, 4.66; N, 5.25. Found: C, 48.26; H 4.35; N, 5.23.

## References and Notes

- <sup>1</sup> L. Malatesta, C. Cariello, *J. Chem. Soc.* 1958, 2323.
- <sup>2</sup> Prepared accordingly to ref. 1. For spectroscopic data, see: C. J. Cobley, P. G. Pringle, *Inorg. Chim. Acta* **1997**, 265, 107.

- <sup>3</sup> Prepared according to ref. 1. For spectroscopic data, see: A. R. Siedle, R. A. Newmark, W. B. Gleason, *J. Am. Chem. Soc.* 1986, **108**, 767.
- <sup>4</sup> Prepared accordingly to: M. P. Brown, R. J. Puddephatt, M. Rashidi, K. R. Seddon, *J. Chem. Soc., Dalton Trans.* 1977, 951. For spectroscopic data, see: T. G. Appleton, M. A. Bennett; I. B. Tomkins, *J. Chem. Soc., Dalton Trans.* 1976, 439.
- <sup>5</sup> R. Romeo, L. M. Scolaro, *Inorg. Synt.* 1998, **32**, 153.
- <sup>6</sup> A. Pasini, S. Rizzato, D. De Cillis, *Inorg. Chim. Acta* 2001, **315**, 196.
- <sup>7</sup> S. Fantasia, M. Manassero, A. Pasini, *Inorg. Chem. Commun.* 2004, 7, 97.
- <sup>8</sup> N. Kuhn, T. Kratz, *Synthesis* 1993, 561.
